# Supplementary material for: Leprosy trends at a tertiary care hospital in Mumbai, India, from 2008 to 2015
Source: PubMed Central journal article supplement (PMC5123210; doi:10.3402/gha.v9.32962), 2016-11-23
Supplement: GHA-9-32962-s001.pdf [file GHA-9-32962-s001.pdf]

**Supplement 1:** Residency status of the study population

| State/Country  | Number of cases | %          |
|----------------|-----------------|------------|
| Uttar Pradesh  | 217             | 37.5       |
| Maharashtra    | 188             | 32.5       |
| Bihar          | 46              | 8.0        |
| Karnataka      | 27              | 4.7        |
| Andhra Pradesh | 17              | 2.9        |
| Gujarat        | 15              | 2.6        |
| <b>Nepal</b>   | <b>15</b>       | <b>2.6</b> |
| Madhya Pradesh | 10              | 1.7        |
| Tamil Nadu     | 10              | 1.7        |
| Odisha         | 9               | 1.6        |
| Rajasthan      | 5               | .9         |
| West Bengal    | 5               | .9         |
| Others         | 14              | 2.0        |
